# Supplementary material for: Increased protein intake affects pro-opiomelanocortin (POMC) processing, immune function and IGF signaling in peripheral blood mononuclear cells of home-dwelling old subjects using a genome-wide gene expression approach
Source: Genes Nutr. 2019 Nov 28;14:32. doi: 10.1186/s12263-019-0654-6 (PMC6883584; doi:10.1186/s12263-019-0654-6)
Supplement: Supplementary file 1 — Additional file 1: Table S1. Genes that were differently expressed (p<0.05) after intake of protein. LogFoldChange is calculated by substracting Log2 ratios. [file 12263_2019_654_MOESM1_ESM.xlsx]

## Sheet: Sheet1
Suplementary table 1 - genes that were differently expressed (p<0.05) after intake of protein. LogFoldChange is calculated by substracting Log2 ratios
Gene symbol	logFoldChange	p-value	FDR, q<0.25
ZNF543	0.362283	1.17313e-07	0.0014236
KDM5A	-0.282381	4.59085e-07	0.0027855
RPL23A	0.22178	8.73474e-06	0.035332
HOPX	0.289138	2.9282e-05	0.0732904
GNLY	0.237009	3.01979e-05	0.0732904
DKFZp762B162	0.324056	3.67762e-05	0.0743798
ZNF683	0.366813	6.74639e-05	0.111612
KIR2DL1	0.320556	7.79517e-05	0.111612
KLRC3	0.269766	8.27779e-05	0.111612
CCL4L2	0.31478	0.000101185	0.117199
PRSS30P	0.261267	0.000109955	0.117199
KIR-K36	0.221951	0.000115895	0.117199
FGFBP2	0.293677	0.000228915	0.213683
TMEM87B	0.139118	0.000264328	0.228145
FAM108A1	0.155723	0.00030645	0.228145
GPR56	0.272535	0.000346973	0.228145
KIR2DL4	0.296032	0.000351326	0.228145
MMP23B	0.287093	0.000370624	0.228145
KIR3DL3	0.243304	0.000420278	0.228145
CCDC65	0.158993	0.000440408	0.228145
PTGDR	0.248503	0.000448049	0.228145
TLR9	-0.198861	0.000451881	0.228145
KIR2DS5	0.210956	0.000467547	0.228145
CTSW	0.221107	0.000470953	0.228145
HERC3	0.165414	0.000484845	0.228145
NMUR1	0.258354	0.000498497	0.228145
CLIC3	0.265128	0.000507615	0.228145
CCL4	0.282045	0.000692702	0.295373
MPP7	-0.185466	0.000705876	0.295373
CX3CR1	0.194781	0.000823996	0.325469
BQ944104	0.172401	0.000831442	0.325469
NUAK1	0.195644	0.000877011	0.326574
CLDND2	0.278419	0.000917081	0.326574
PTGDS	0.227143	0.000951053	0.326574
SAMD3	0.178113	0.000951713	0.326574
PRKDC	-0.186928	0.000968823	0.326574
KIR3DL1	0.2483	0.0010093	0.331025
IFNG	0.337008	0.00107281	0.342592
SLC1A7	0.170624	0.00111625	0.347327
SCP2	0.167805	0.00120632	0.352511
KLRF1	0.251588	0.00121105	0.352511
MEX3C	0.162358	0.00122006	0.352511
GPR114	0.215753	0.00129123	0.360876
SLC12A4	-0.150344	0.00134791	0.360876
LCP2	0.141491	0.00138637	0.360876
GZMM	0.188351	0.00142906	0.360876
PPP2R2B	0.224691	0.00145177	0.360876
POLR3F	-0.125445	0.00145412	0.360876
IMAA	0.135511	0.00145718	0.360876
TTLL12	-0.140595	0.00152698	0.367597
KLRG1	0.209104	0.00154491	0.367597
PRF1	0.24493	0.00161027	0.374609
RAP1GAP2	0.147577	0.00163612	0.374609
ADAMTS1	0.169985	0.00169461	0.380817
FKBP1B	0.156647	0.00181085	0.394543
CERCAM	0.161722	0.00185251	0.394543
PRSS23	0.249842	0.00185323	0.394543
GRIP2	-0.154853	0.00188922	0.39527
IFI16	0.191445	0.00195694	0.402071
KIR3DL2	0.212752	0.00198799	0.402071
PLEKHF1	0.201394	0.00215711	0.429124
STAT4	0.140068	0.00224603	0.433619
KLRD1	0.305803	0.00226466	0.433619
CST7	0.211313	0.00232092	0.433619
KIR2DS2	0.188349	0.00232264	0.433619
VAMP8	-0.150484	0.00237887	0.437007
NKG7	0.183396	0.0024243	0.437007
OTUB1	-0.141703	0.00244883	0.437007
SLCO4C1	0.235976	0.00261836	0.456727
GCLM	0.137517	0.00275229	0.456727
IQCG	0.109849	0.0027669	0.456727
GSK3A	-0.160378	0.00281294	0.456727
BPI	-0.157331	0.00282921	0.456727
GNPTAB	0.143138	0.00291877	0.456727
CD160	0.23282	0.00293424	0.456727
PPM1H	-0.143451	0.00295588	0.456727
SH2D1B	0.237872	0.00297579	0.456727
TARP	0.186366	0.00303821	0.456727
ARL4C	0.196308	0.00304071	0.456727
TTC16	0.155188	0.00304719	0.456727
CR603183	0.194884	0.00304861	0.456727
FNDC3B	0.160534	0.00314955	0.466095
HAUS7	-0.109458	0.00318896	0.466241
GZMH	0.225343	0.00323248	0.466978
TMEM168	0.125831	0.00327331	0.467314
TXNDC16	0.133585	0.00344938	0.486724
MMADHC	0.14193	0.00354254	0.494123
C8orf48	0.13292	0.0038186	0.512376
PDZD4	0.145315	0.00386416	0.512376
COCH	-0.191348	0.00387524	0.512376
MFN1	0.110596	0.00388384	0.512376
ANO8	0.222894	0.00388987	0.512376
BHLHE40	0.124451	0.00392674	0.512376
GPR19	0.156762	0.00403779	0.521262
SDC1	-0.150472	0.00416536	0.532069
TPRN	-0.138687	0.00422823	0.533686
GZMB	0.191656	0.00429734	0.533686
ADRB2	0.181694	0.00430995	0.533686
B3GAT1	0.220343	0.0044902	0.55039
TOP1MT	-0.159227	0.00459253	0.552183
C7orf64	0.167182	0.00470379	0.552183
LOC100288798	0.143649	0.00479042	0.552183
CAPN12	0.111426	0.0048264	0.552183
AX747752	0.20962	0.00484864	0.552183
FAM82A2	0.113124	0.00486378	0.552183
PRR5L	0.202439	0.00489112	0.552183
FTSJ3	-0.107403	0.00491144	0.552183
EPDR1	0.178375	0.00491576	0.552183
ITFG3	-0.120664	0.00500571	0.552183
RETN	-0.233176	0.00502903	0.552183
PIK3CA	-0.151678	0.00505087	0.552183
DDX20	0.145556	0.00516556	0.552389
DHX34	-0.114486	0.0051873	0.552389
HCST	0.102224	0.00523234	0.552389
NAP1L5	0.136407	0.00525392	0.552389
FLJ42627	-0.106309	0.00528036	0.552389
TMEM170B	-0.182234	0.0054389	0.561875
UCP3	0.128523	0.00546363	0.561875
BAP1	-0.118832	0.00556786	0.563209
DHRS3	0.152278	0.00556943	0.563209
WNT10A	-0.152297	0.00569444	0.571091
EHD4	-0.166028	0.00587699	0.575452
TCRGV	0.186496	0.00589031	0.575452
ARNT	-0.120039	0.00594959	0.575452
VCP	-0.115156	0.00597441	0.575452
SBK1	0.13462	0.00597503	0.575452
B3GNT1	-0.165297	0.00618246	0.577448
NCALD	0.156594	0.00620703	0.577448
ERBB2	0.157138	0.00628837	0.577448
ZNF345	0.168869	0.00630666	0.577448
TTC38	0.209299	0.00631219	0.577448
CCNL2	-0.164111	0.00633472	0.577448
GFI1	0.179464	0.00637574	0.577448
ELOVL6	0.146431	0.00649916	0.577448
DNASE1L3	-0.124355	0.00650211	0.577448
CNRIP1	-0.129491	0.006556	0.577448
ENPP5	0.150022	0.00655801	0.577448
GLCCI1	0.135813	0.00656677	0.577448
LYRM4	-0.145891	0.00670153	0.582756
CTNNB1	0.144552	0.00672319	0.582756
PIBF1	0.121683	0.00691399	0.592723
ADA	0.12566	0.00693586	0.592723
C1orf115	-0.142842	0.00707334	0.595038
CCZ1	0.170728	0.00711355	0.595038
RCC1	-0.133632	0.00711959	0.595038
HADHA	-0.137533	0.00716742	0.595038
ST6GALNAC4	-0.123798	0.00728174	0.595038
SRCIN1	-0.151855	0.00731158	0.595038
CXCR2	0.218001	0.00733027	0.595038
GZMA	0.187214	0.00743391	0.595038
TTC7A	-0.168075	0.00744161	0.595038
IQSEC3	-0.137057	0.0074533	0.595038
MED27	0.256275	0.00776096	0.612635
POLE2	0.116197	0.00777468	0.612635
IRS2	-0.180707	0.00809852	0.631312
TBCB	-0.0921759	0.00812296	0.631312
FCRL6	0.163433	0.00821952	0.631312
ASAH2B	-0.128856	0.00826915	0.631312
KPTN	-0.134504	0.00829511	0.631312
RNF144B	-0.200463	0.00832385	0.631312
C12orf49	0.108595	0.00842884	0.635304
TXN2	-0.14716	0.00855674	0.640963
CD164	0.130125	0.00864767	0.641779
ASCL2	0.147456	0.00868293	0.641779
PYHIN1	0.139278	0.00876859	0.641779
CLIP4	0.124258	0.00885265	0.641779
DTHD1	0.125805	0.00887038	0.641779
S1PR5	-0.206282	0.00893426	0.641779
INTS1	-0.106245	0.00900464	0.641779
APOBEC3G	0.212836	0.00901824	0.641779
SLC26A11	-0.163077	0.00908957	0.641779
GGA3	-0.114803	0.00911629	0.641779
SPON2	0.177481	0.00919587	0.641779
ARL4A	-0.145893	0.00931081	0.641779
AKR1C3	0.205404	0.00934131	0.641779
ZNF776	-0.113344	0.00934515	0.641779
TCEAL4	-0.0952173	0.00938937	0.641779
WFS1	-0.120435	0.00941382	0.641779
MTCP1NB	0.0920844	0.00950077	0.642228
DYSFIP1	-0.141042	0.00952624	0.642228
ECHS1	-0.107486	0.00959825	0.642399
VAV2	-0.135623	0.00968174	0.642399
RORA	0.191518	0.00979593	0.642399
ZER1	-0.151864	0.00986253	0.642399
SHKBP1	-0.135775	0.00994521	0.642399
PDE4B	0.13578	0.0100692	0.642399
BNC2	0.151503	0.0100723	0.642399
SLC25A10	-0.121821	0.0101481	0.642399
MEN1	-0.0905861	0.010169	0.642399
IL18RAP	0.15772	0.0102807	0.642399
CCND1	-0.128995	0.0103094	0.642399
TTC9C	0.107595	0.0103738	0.642399
FAM8A1	0.139703	0.0103787	0.642399
SLC20A1	0.106531	0.0103848	0.642399
AK124143	0.187559	0.0104051	0.642399
MGA	0.0968175	0.0104415	0.642399
CCT5	-0.102663	0.0104694	0.642399
LRRC40	0.133988	0.0105281	0.642399
SLC4A4	0.154723	0.0105459	0.642399
GRAMD4	-0.119098	0.0105875	0.642399
ENPP4	0.182449	0.0108471	0.654875
HLX	-0.261738	0.0109793	0.657337
WDR18	-0.0905271	0.0109962	0.657337
AXIN1	0.101949	0.0112123	0.658949
TMEM120A	-0.104485	0.0112704	0.658949
C17orf61	-0.0836733	0.0112753	0.658949
FEZ1	0.194463	0.0113195	0.658949
SND1	-0.139801	0.0113985	0.658949
CN357243	-0.160282	0.0114126	0.658949
BZRAP1	0.177798	0.0114704	0.658949
RAP1B	0.198476	0.0114976	0.658949
NFYB	-0.114617	0.0115119	0.658949
CNOT3	-0.164221	0.0116923	0.666134
AF086132	0.112607	0.0117704	0.667288
CAPZA1	0.229318	0.0119286	0.667288
HARS2	0.0896375	0.0119286	0.667288
BU153693	-0.115453	0.0119638	0.667288
SCAP	-0.0846314	0.0119948	0.667288
SFTA3	0.127652	0.0121434	0.667288
EPG5	0.108963	0.012151	0.667288
CENPH	0.127489	0.0122699	0.667288
PDGFRB	0.197988	0.0122987	0.667288
WDR89	0.160485	0.0123379	0.667288
SOX13	0.122549	0.0123535	0.667288
LAIR2	0.163987	0.0123785	0.667288
KIF2A	0.121169	0.0124275	0.667288
ZNF433	0.130415	0.0125579	0.67009
CELF1	0.113366	0.0125901	0.67009
SRGAP3	-0.12145	0.0127254	0.67105
NFKB2	-0.195118	0.0127623	0.67105
TRIM23	0.137353	0.012774	0.67105
PLP2	-0.116813	0.0128326	0.671221
L3MBTL2	-0.1075	0.0128932	0.671496
PUS7	-0.0973325	0.0129697	0.672597
CA429274	-0.267831	0.0130949	0.676092
KRCC1	-0.111244	0.013196	0.676092
EMILIN2	-0.153985	0.0132886	0.676092
DCAF5	0.0962689	0.0133611	0.676092
TRPC1	-0.113064	0.0134679	0.676092
TFPT	-0.102574	0.013495	0.676092
CMKLR1	0.185449	0.0135299	0.676092
PDXK	-0.141844	0.0135372	0.676092
CTSF	-0.12469	0.0135385	0.676092
LDOC1L	0.133052	0.013691	0.680905
DLG4	-0.253079	0.0138589	0.684523
GSR	0.103119	0.0138768	0.684523
LOC400657	0.0889786	0.013933	0.684523
C20orf111	0.0796641	0.0140042	0.684807
TMEM14C	-0.121352	0.0140805	0.684807
C21orf122	0.112044	0.0141576	0.684807
IGFBP4	-0.122218	0.0141645	0.684807
DLL1	-0.111143	0.0142664	0.686912
RSAD2	0.284431	0.0143213	0.686912
AGPAT2	-0.103664	0.0146939	0.70201
EPHX4	0.165174	0.0148734	0.705004
FSCN1	-0.124387	0.0149909	0.705004
FAM120C	0.103486	0.0151531	0.705004
NAA50	0.126093	0.0154003	0.705004
SAFB	-0.0935815	0.0154745	0.705004
KIAA0146	-0.137299	0.0155128	0.705004
AGPAT9	-0.157676	0.0156052	0.705004
LOC728855	0.133484	0.0156577	0.705004
PURA	0.161911	0.0156725	0.705004
MVP	-0.123038	0.015768	0.705004
CD226	0.123152	0.0157909	0.705004
PPFIBP2	-0.0971284	0.0158586	0.705004
WDR67	0.112325	0.0159075	0.705004
RRAS2	0.1682	0.0159384	0.705004
TPCN2	-0.142561	0.0159703	0.705004
RIN1	-0.155599	0.0160494	0.705004
FLJ39653	-0.0792625	0.0161124	0.705004
FAM179A	0.134117	0.016121	0.705004
MTND5	-0.1067	0.0163047	0.705004
FAN1	-0.132784	0.0163076	0.705004
PDE4DIP	-0.106854	0.0163953	0.705004
ARPC5L	0.1286	0.016405	0.705004
SMAD7	0.171461	0.0164649	0.705004
RRP1	-0.148883	0.0165495	0.705004
CDK5	-0.146925	0.0165973	0.705004
KLRC1	0.182901	0.0166596	0.705004
ZNF282	-0.114883	0.0166877	0.705004
LMNB2	-0.104626	0.0166929	0.705004
NECAP2	-0.0901009	0.0167799	0.705004
ATF1	0.0990098	0.0168177	0.705004
NCBP2	0.107529	0.0168499	0.705004
RAD21L1	-0.112009	0.0168563	0.705004
LOC388588	0.119605	0.0168669	0.705004
RPS2P32	-0.152323	0.0169334	0.705004
WDR90	-0.133141	0.0170558	0.705004
CCR9	-0.139042	0.0170652	0.705004
LMNA	-0.131301	0.0170775	0.705004
ABCA1	-0.18278	0.0171234	0.705004
MPZL2	-0.137399	0.0171839	0.705004
LOC100125556	0.117967	0.0172933	0.705004
ARFGAP1	-0.119456	0.0173614	0.705004
CACNA1S	-0.173696	0.0174758	0.705004
TRIM5	0.138048	0.0174873	0.705004
AK302238	-0.121274	0.0175128	0.705004
STARD3NL	0.187437	0.0175754	0.705004
MXRA7	0.151668	0.017584	0.705004
VENTX	-0.159947	0.017614	0.705004
GPR65	0.108677	0.0176475	0.705004
C17orf67	-0.131458	0.0176641	0.705004
KIAA0922	-0.0939766	0.0177265	0.705004
COQ6	-0.0878815	0.0177636	0.705004
MLLT11	0.104444	0.0178809	0.705004
NCR3	0.131737	0.0179067	0.705004
BX115738	-0.115832	0.01804	0.705004
DKFZp761E198	0.178295	0.0181357	0.705004
GAB3	0.150974	0.0182595	0.705004
TMEM184B	-0.163803	0.0183213	0.705004
ZNF254	0.1524	0.018384	0.705004
OTOF	0.13186	0.0184278	0.705004
FSD1	0.132044	0.0184707	0.705004
C7orf11	0.101112	0.0184841	0.705004
C7orf47	0.0949722	0.0184928	0.705004
PTPN4	0.15568	0.0186289	0.705004
RASA2	0.139873	0.0186538	0.705004
ABI3	0.140532	0.0186615	0.705004
LAMB2L	-0.115788	0.0187274	0.705004
TTC13	0.136098	0.0188119	0.705004
CASK	-0.122367	0.0188125	0.705004
MUC6	0.134376	0.0188279	0.705004
AZI1	-0.10166	0.0188856	0.705004
GNPTG	-0.0953975	0.0189856	0.705004
UFM1	0.118218	0.019028	0.705004
USF1	-0.141775	0.0190317	0.705004
G2E3	0.0965637	0.0190867	0.705004
ST14	-0.126637	0.0191138	0.705004
TMEM43	-0.0915522	0.0192548	0.70805
LOC642852	-0.11527	0.0193663	0.708669
DLAT	0.114237	0.0194241	0.708669
SIGLECP3	0.133367	0.0194468	0.708669
ZNF226	0.116551	0.0195941	0.711898
FAS	0.0892779	0.0196885	0.713194
KIAA0531	-0.114266	0.0197765	0.714249
SP3	-0.145396	0.0198989	0.715423
SUMF1	-0.102263	0.0199269	0.715423
C12orf75	0.139132	0.0201043	0.719663
HLA-C	0.128678	0.0201991	0.72093
BX115642	0.134519	0.0203198	0.722517
ITCH	0.116297	0.0204352	0.722517
AK090694	-0.119245	0.0204374	0.722517
ZNF791	0.124089	0.0206317	0.722517
ZNF679	0.157517	0.0206448	0.722517
ANAPC1	-0.107995	0.0206938	0.722517
DOCK2	-0.0835978	0.0207177	0.722517
MXI1	-0.101585	0.0207366	0.722517
ANO10	-0.109772	0.0207794	0.722517
MAN2B1	-0.106087	0.0208864	0.72416
MOCS1	0.142099	0.0210738	0.726881
CARKD	-0.120659	0.0211531	0.726881
ZNF407	-0.106058	0.0211738	0.726881
PCIF1	-0.109556	0.0214847	0.726881
NDUFS7	-0.0866733	0.0215209	0.726881
ACOX2	-0.155575	0.0215861	0.726881
ZNF653	-0.0847515	0.0216086	0.726881
OR2A42	-0.135522	0.0216156	0.726881
DCHS1	-0.103485	0.0217235	0.726881
RNF138	-0.0958714	0.0217362	0.726881
CR625988	-0.101046	0.0218026	0.726881
DENND1A	-0.115185	0.021822	0.726881
C1orf21	0.135755	0.0218754	0.726881
SH3BP4	-0.122537	0.0221187	0.726881
U2SURP	0.0948006	0.0221501	0.726881
FAM108C1	0.114001	0.0222233	0.726881
SPINT2	-0.106684	0.0222665	0.726881
ANKRD40	0.0753055	0.0223773	0.726881
HSPA13	0.0890686	0.0224131	0.726881
PCNX	-0.0884263	0.0224194	0.726881
C19orf59	-0.195997	0.0224789	0.726881
ADSL	-0.0820524	0.022493	0.726881
PIAS3	0.0872749	0.0224961	0.726881
TIPIN	0.0787399	0.0225032	0.726881
TMEM169	0.0888409	0.0225701	0.726881
MYB	-0.141373	0.0226766	0.726881
GANAB	-0.127978	0.0226776	0.726881
ZNF516	-0.138518	0.0227566	0.726881
NARFL	-0.12048	0.0227571	0.726881
ZCCHC24	-0.123684	0.0227618	0.726881
TMED3	-0.0867991	0.0228274	0.727062
GTF2IP1	0.200486	0.0232355	0.730401
RAB28	0.159115	0.0232557	0.730401
KCTD10	0.0942958	0.0234101	0.730401
PTPRM	0.111716	0.0234196	0.730401
MTHFD1L	-0.108724	0.0234543	0.730401
HEATR2	-0.0806136	0.0234716	0.730401
RNASE6	-0.116316	0.0234837	0.730401
COLQ	0.156136	0.023492	0.730401
SNORD25	0.12798	0.0235076	0.730401
UNC45A	-0.0984987	0.0236149	0.730401
CXorf26	0.0782394	0.02363	0.730401
GNA11	-0.128657	0.0237124	0.730401
TXNL1	0.130412	0.0237147	0.730401
STK39	0.114435	0.0238672	0.733236
MPP5	-0.111996	0.0240445	0.733844
PRMT5	-0.0811554	0.0240528	0.733844
INSIG1	0.138997	0.0240732	0.733844
KLF3	0.0996558	0.0241289	0.733844
LOC647979	0.12965	0.0243235	0.73639
ACPT	0.183804	0.0244216	0.73639
MIB2	0.0921939	0.0244577	0.73639
IL3RA	-0.104654	0.0244751	0.73639
C9orf102	-0.12001	0.0245683	0.73639
POGZ	-0.128274	0.0246341	0.73639
TEX2	-0.0803643	0.0246927	0.73639
SOAT1	0.0972007	0.0247562	0.73639
FAM36A	0.107913	0.0247587	0.73639
AA906391	0.145567	0.0248934	0.738584
INPPL1	-0.112325	0.0250386	0.738667
KIF21B	0.108872	0.0250785	0.738667
TNIK	0.132498	0.0250788	0.738667
ABHD12	-0.0895704	0.025337	0.744466
GATC	0.0817356	0.0255325	0.745887
GRB10	0.118525	0.0255613	0.745887
CR594811	-0.113246	0.0256943	0.745887
AI821401	0.142296	0.0256946	0.745887
HSP90AB1	-0.109588	0.0258484	0.745887
SH2D3A	-0.107299	0.0259473	0.745887
MLL3	-0.20247	0.026101	0.745887
SPN	0.154332	0.0261408	0.745887
POMC	-0.0980423	0.0261627	0.745887
CN268422	-0.0893082	0.0263507	0.745887
ZDHHC12	-0.0898429	0.0263661	0.745887
GBP5	0.102367	0.026407	0.745887
LOC401321	0.085722	0.026418	0.745887
RCN2	0.141111	0.026428	0.745887
BC046381	-0.123291	0.0264358	0.745887
NCAM1	0.133854	0.0264451	0.745887
MFN2	-0.107298	0.0264768	0.745887
DACT1	-0.121508	0.0264959	0.745887
LOC653075	0.114093	0.0265532	0.745887
ZNF193	0.101717	0.0267414	0.746643
CB243773	0.125141	0.0267747	0.746643
LITAF	0.0913872	0.0268329	0.746643
FCER1A	-0.193772	0.0270127	0.746643
PBX2	-0.0817192	0.0270244	0.746643
C15orf44	0.15291	0.02714	0.746643
RAB33A	0.116755	0.0271579	0.746643
ALG11	-0.0986413	0.0272521	0.746643
MBOAT7	-0.133177	0.0272523	0.746643
BDP1	0.136322	0.0274122	0.746643
RTN3	-0.108956	0.0274625	0.746643
AI694603	-0.169609	0.0275494	0.746643
AA609391	-0.127171	0.0276062	0.746643
LOC202181	0.0812338	0.02772	0.746643
IRAK3	-0.142754	0.0277339	0.746643
NBPF1	-0.199722	0.0278194	0.746643
HENMT1	0.0932286	0.0278925	0.746643
ZNF579	-0.132914	0.0279261	0.746643
NHLRC4	0.110978	0.0279874	0.746643
RNF169	0.0886074	0.0279969	0.746643
AK097337	-0.121623	0.0280665	0.746643
SLC25A26	0.13335	0.0280665	0.746643
THADA	-0.087099	0.0280858	0.746643
SRRD	0.122742	0.0281122	0.746643
CEACAM4	-0.12715	0.0282778	0.746643
CCDC146	0.107719	0.0283629	0.746643
TRAPPC10	0.0860287	0.0283695	0.746643
LARS	-0.0924071	0.0283801	0.746643
HTRA2	0.111008	0.028485	0.746643
MBTPS1	-0.103591	0.028506	0.746643
NONO	-0.088562	0.028549	0.746643
C7orf36	0.0933665	0.0285909	0.746643
KCNH8	-0.111053	0.0287234	0.746643
RRP7A	-0.074539	0.0287881	0.746643
FBXO3	0.108864	0.0288773	0.746643
RBM26	0.108633	0.0288877	0.746643
MICALCL	-0.127571	0.0289615	0.746643
UBE2E2	-0.108738	0.0289795	0.746643
CANX	-0.100557	0.0290289	0.746643
ENGASE	-0.14572	0.0290412	0.746643
NFKB1	-0.0704384	0.0291107	0.746848
PXMP4	0.104002	0.0293234	0.750717
GOLPH3L	0.103627	0.0293932	0.750918
DDX19B	-0.0706136	0.0295756	0.753992
EHD3	0.113548	0.0298596	0.759635
SOCS4	0.112711	0.0300548	0.760395
ZNF429	0.111145	0.0300574	0.760395
C10orf128	0.105265	0.0301205	0.760395
PAQR7	-0.134925	0.0301401	0.760395
ALDH2	-0.144182	0.0302527	0.760836
VARS2	-0.0837338	0.030283	0.760836
TREM1	-0.194962	0.0303644	0.761305
DOCK11	0.0808933	0.0306372	0.765262
AHR	-0.106887	0.0308386	0.765262
TAOK1	-0.256552	0.0308893	0.765262
SEH1L	0.12768	0.0310293	0.765262
RANBP2	0.113064	0.0310537	0.765262
DDB1	-0.075771	0.0311282	0.765262
HOOK3	-0.0775958	0.0311331	0.765262
KLRB1	0.087053	0.0311848	0.765262
FAM53C	-0.0941278	0.0312431	0.765262
SCARNA16	-0.167058	0.0313411	0.765262
BX098198	-0.131381	0.031433	0.765262
SLC39A9	0.110208	0.0314923	0.765262
FRMPD3	0.125049	0.031694	0.765262
EIF2B2	0.117652	0.0317742	0.765262
FUBP1	-0.0888273	0.0317801	0.765262
GPD1L	-0.082418	0.0317818	0.765262
AB072895	0.122403	0.0319129	0.765262
PPP1R12A	0.0961922	0.0319233	0.765262
SLC24A1	-0.104117	0.03194	0.765262
PRDM8	-0.139684	0.0319989	0.765262
ZNF706	-0.102055	0.0320153	0.765262
GALNT10	0.0972457	0.0321232	0.765262
PGP	-0.101231	0.0321289	0.765262
TMEM200A	-0.138377	0.0321809	0.765262
KIAA1949	0.117395	0.0322767	0.765262
PRSS57	0.129785	0.032287	0.765262
ATAD3B	0.0911002	0.0323748	0.765262
MORN3	-0.10923	0.0324148	0.765262
APOBR	0.0886927	0.0324165	0.765262
ATL2	0.0874831	0.0324708	0.765262
AKR1C4	0.170614	0.0325928	0.765262
CDKAL1	0.153388	0.0326572	0.765262
C17orf97	-0.0947541	0.0326723	0.765262
CDK14	-0.099778	0.0327265	0.765262
DVL1	-0.133943	0.0327645	0.765262
RHOC	0.10634	0.0327924	0.765262
FOXRED1	-0.102694	0.0330198	0.766004
NUDC	-0.0709001	0.0330454	0.766004
DKFZp547I014	0.110104	0.0330932	0.766004
GPR141	0.115384	0.0332531	0.766004
OXCT1	-0.134492	0.0332598	0.766004
STK11IP	-0.110978	0.0333799	0.766004
TPD52L2	-0.102117	0.0334248	0.766004
PHRF1	-0.0948187	0.0334585	0.766004
SEC61A1	-0.11874	0.0334913	0.766004
CCNA2	-0.134498	0.033515	0.766004
CELSR3	0.095828	0.0335418	0.766004
ADAM10	0.177263	0.0335817	0.766004
METTL18	0.0957423	0.0336713	0.766606
LOC441869	-0.101669	0.0338893	0.769668
GIMAP6	0.105397	0.0339444	0.769668
PRAF2	-0.101104	0.034157	0.769668
AGAP3	-0.134514	0.0341692	0.769668
HIST1H4C	-0.144098	0.0341988	0.769668
PEX6	-0.114118	0.0343163	0.769668
LIN7C	-0.0977569	0.0343603	0.769668
PCBP2	-0.0893153	0.0343762	0.769668
AK098179	-0.1062	0.0343766	0.769668
RSL1D1	-0.0829335	0.0344792	0.770545
PPTC7	0.119184	0.0345524	0.770759
GOLGA2	-0.11326	0.0346802	0.770929
GORAB	0.0870319	0.034687	0.770929
ICAM3	-0.107598	0.0348275	0.772491
SREBF2	-0.107328	0.0349987	0.772491
IRX3	0.219559	0.0351815	0.772491
CPT1B	-0.123493	0.0352575	0.772491
CTSB	-0.112529	0.0354542	0.772491
OBFC2B	-0.105807	0.0354699	0.772491
PDE6G	0.0752398	0.0354873	0.772491
GOLGA2LY1	-0.105349	0.0355282	0.772491
USH1G	0.0890831	0.0355437	0.772491
DAPK3	-0.11874	0.0355514	0.772491
RPS6KB1	-0.110483	0.0355814	0.772491
BIN2	0.137315	0.0356379	0.772491
PLIN2	-0.0749035	0.0357398	0.772491
FOXRED2	-0.116697	0.0357918	0.772491
RSC1A1	-0.0779496	0.035816	0.772491
ZUFSP	0.0810307	0.03585	0.772491
BU163701	-0.10626	0.0358536	0.772491
CEP250	-0.0926461	0.0361366	0.772491
AMBRA1	-0.101688	0.0362747	0.772491
JAK1	0.128755	0.0363409	0.772491
HES6	0.112095	0.036348	0.772491
CDRT4	0.148674	0.0363573	0.772491
TP53INP2	0.110553	0.0363828	0.772491
LYAR	0.104585	0.0364022	0.772491
ANKRD39	0.123401	0.0364078	0.772491
TATDN3	-0.103454	0.0364691	0.772491
PPM1F	-0.1169	0.0364761	0.772491
UBTD1	-0.145725	0.0367174	0.776247
CAMKK2	-0.12913	0.0368842	0.776659
UBE2E3	0.108444	0.0369036	0.776659
ERP29	-0.0744457	0.0369781	0.776659
CYP2S1	-0.136079	0.0369929	0.776659
CD99	0.0975806	0.0371203	0.777117
PRKACB	0.181653	0.0371428	0.777117
TPST2	0.0920233	0.0372265	0.777527
CD556913	-0.140663	0.037495	0.780686
FAM69B	0.164074	0.0375318	0.780686
SUV420H1	0.08825	0.0375707	0.780686
LOC153577	0.165271	0.0378908	0.784204
FAM114A2	-0.0897627	0.0379701	0.784204
FANCE	-0.122591	0.0382832	0.784204
MAX	0.217547	0.0383368	0.784204
LOC401561	0.146229	0.0384455	0.784204
TRIM28	-0.0936953	0.0384881	0.784204
LPAR5	0.127266	0.038564	0.784204
DUSP11	0.097261	0.0385734	0.784204
ZNF33A	0.0874487	0.0386433	0.784204
C14orf82	0.165779	0.038698	0.784204
KDM3B	-0.0963761	0.0386997	0.784204
TECPR1	-0.128859	0.0388036	0.784204
IL2RB	0.149759	0.0388238	0.784204
AI351498	-0.110419	0.0388968	0.784204
AK027322	-0.302523	0.0389276	0.784204
BG341847	-0.116702	0.0389849	0.784204
CEP63	0.0697692	0.0389889	0.784204
ATAD1	0.0966354	0.0390499	0.784204
HMHA1	-0.0976375	0.0391407	0.784204
hCG_1993022	-0.0926429	0.0391472	0.784204
TRAPPC3	-0.0712013	0.039164	0.784204
C6orf192	-0.0985989	0.0392601	0.784204
RSBN1L	0.0818683	0.0393753	0.784204
MRPS28	0.0926155	0.0394821	0.784204
ABCB1	0.115868	0.0395089	0.784204
DLST	-0.086939	0.0395323	0.784204
KIAA2026	0.0914322	0.0396254	0.784204
STIL	-0.115811	0.0397846	0.784204
NOP16	0.118318	0.0398268	0.784204
EIF2C1	-0.0873219	0.0399102	0.784204
HAUS4	-0.0889922	0.0399277	0.784204
GRK5	0.0858224	0.0399827	0.784204
PES1	-0.109615	0.0399948	0.784204
TTLL4	-0.113751	0.0400361	0.784204
KBTBD11	-0.0968483	0.0400388	0.784204
PTCH1	0.118333	0.0400664	0.784204
AGAP1	0.141659	0.0402145	0.785833
THOP1	-0.079879	0.0403183	0.786595
GABPB1	0.140558	0.0404728	0.786892
AP1G1	0.124857	0.0404769	0.786892
MLL5	0.128837	0.040528	0.786892
RTP4	0.122224	0.0407311	0.78735
BC026095	0.148227	0.0407477	0.78735
PURB	0.0832318	0.0407578	0.78735
POC1B	0.0837327	0.0408111	0.78735
SPA17	-0.110051	0.0409504	0.787982
BOK	0.120924	0.040989	0.787982
GOT2	-0.0850141	0.0410387	0.787982
MIR1228	0.111254	0.0411724	0.789301
KCNK17	-0.130454	0.0413824	0.78976
SOS1	0.0854456	0.0416534	0.78976
BANP	-0.0784952	0.0416853	0.78976
ELK1	-0.0786426	0.0417204	0.78976
ZNF415	0.0879792	0.0417429	0.78976
C6orf1	0.118513	0.0417676	0.78976
PIGS	-0.0759375	0.0418186	0.78976
BABAM1	-0.0748969	0.0418695	0.78976
SERPINA10	-0.13648	0.0419363	0.78976
MPDU1	-0.108881	0.0419635	0.78976
FOXO3	-0.120254	0.041971	0.78976
PDGFD	0.12785	0.0421526	0.78976
OR7E156P	0.102708	0.0421816	0.78976
HYLS1	0.0806754	0.0422595	0.78976
SAR1B	0.0800634	0.042422	0.78976
HMBS	-0.0988089	0.042459	0.78976
ATXN1	-0.085303	0.0425018	0.78976
GEMIN4	-0.0957924	0.042546	0.78976
MET	0.0980385	0.0426005	0.78976
TMEM45A	0.137758	0.0426032	0.78976
PRPF38B	0.0861067	0.0426203	0.78976
TNNT1	0.123117	0.0426282	0.78976
MRS2	0.0965339	0.0427925	0.791596
OTOGL	-0.0853872	0.0429495	0.792044
TXNRD2	-0.0931793	0.0429881	0.792044
ADORA3	-0.138811	0.043021	0.792044
ADAM15	-0.132107	0.0430778	0.792044
PSMA3	0.0861019	0.0436779	0.794883
LTV1	0.080178	0.0437196	0.794883
SLC25A6	-0.076706	0.0437258	0.794883
RAB37	0.106689	0.0437723	0.794883
FUT7	-0.102451	0.0438111	0.794883
NUP153	0.0844631	0.0440652	0.794883
CLK1	0.14133	0.044124	0.794883
PI16	-0.136747	0.0443917	0.794883
BG496815	0.114129	0.0444365	0.794883
PHLDB2	0.11434	0.044582	0.794883
FCRLB	0.124427	0.0446886	0.794883
FAM113A	0.142346	0.0447605	0.794883
ZNF671	-0.102182	0.0448261	0.794883
NCKAP5L	-0.133327	0.0448359	0.794883
ZNF232	0.0760026	0.0448661	0.794883
MAP3K14	-0.118826	0.0449655	0.794883
POMP	0.0750026	0.0449948	0.794883
PCDH9	-0.117698	0.0450292	0.794883
EPHA1	-0.117575	0.0450675	0.794883
ZBTB38	0.126785	0.0450729	0.794883
NDST2	-0.0714585	0.0451934	0.794883
PIWIL4	0.104983	0.045503	0.794883
SERPINB9	0.123598	0.0455078	0.794883
C9orf86	-0.130101	0.0455143	0.794883
RDH10	0.0754219	0.0455965	0.794883
NPRL2	0.0863235	0.0456826	0.794883
BI827719	-0.0950634	0.0457519	0.794883
SDHD	0.153797	0.0457708	0.794883
TRMT1	-0.0836015	0.0457971	0.794883
LONP1	-0.0895617	0.0458436	0.794883
FAM119A	-0.130728	0.0458478	0.794883
GPR68	0.119275	0.0459838	0.794883
RPN1	-0.0897145	0.0460827	0.794883
TMUB1	0.0701148	0.0461223	0.794883
UBE2W	0.128866	0.0461367	0.794883
SCD5	0.09668	0.046398	0.794883
TRIM37	0.0958325	0.0464698	0.794883
ENG	-0.101816	0.04647	0.794883
ANKDD1A	0.0994181	0.046484	0.794883
ELK4	-0.0860014	0.0465224	0.794883
MARCKSL1	-0.103773	0.0465345	0.794883
ZFP30	0.123233	0.046603	0.794883
PSENEN	0.0879216	0.0467797	0.794883
NLRP1	-0.109322	0.046808	0.794883
IRF8	-0.0873019	0.0469036	0.794883
ITPK1	-0.126025	0.0469416	0.794883
PPP6R3	-0.101262	0.0470195	0.794883
PUM1	-0.103216	0.04705	0.794883
SP4	0.126888	0.047085	0.794883
RASGRP4	-0.120477	0.0471781	0.794883
NPY5R	0.104218	0.0473298	0.794883
NCRNA00094	-0.0814149	0.0473609	0.794883
PSMG2	0.084915	0.0474242	0.794883
LRRC16A	-0.0886017	0.0475306	0.794883
ARSK	0.087013	0.0475401	0.794883
AP2M1	-0.0751578	0.0475608	0.794883
PAN3	0.0807493	0.0475824	0.794883
NBPF14	-0.14847	0.0476979	0.794883
LOXHD1	-0.108333	0.0477901	0.794883
ASAP1	-0.121059	0.047817	0.794883
GPR146	-0.0993402	0.0478279	0.794883
TXNL4A	0.104395	0.0478284	0.794883
SDAD1	0.066037	0.0478638	0.794883
SIRPG	-0.122297	0.0478823	0.794883
EDEM3	-0.0941963	0.0479025	0.794883
NFE2L2	0.102474	0.0479343	0.794883
MAP2K5	-0.077831	0.0479515	0.794883
NRM	-0.105457	0.0479601	0.794883
C7orf59	-0.0671562	0.0480057	0.794883
RBBP9	-0.0803817	0.0480505	0.794883
RPS18	-0.0713347	0.0480637	0.794883
CLIP1	-0.0694227	0.0481241	0.794883
ERCC1	-0.0815057	0.0481457	0.794883
TPM4	0.112917	0.0482428	0.794883
EFHD2	0.0741755	0.0483075	0.794883
ETHE1	-0.09788	0.0483236	0.794883
CSGALNACT2	0.109008	0.0483335	0.794883
LOC348120	-0.0980706	0.0484867	0.794883
GTF2H1	-0.103128	0.0485238	0.794883
SLC35A5	-0.126227	0.0486022	0.794883
LOC648809	0.0884629	0.0486239	0.794883
CDCA4	0.087391	0.0486438	0.794883
NFKBIA	-0.10348	0.048669	0.794883
PJA1	0.0942042	0.0488689	0.79497
NDST1	-0.151974	0.0489015	0.79497
DMAP1	-0.0854147	0.049	0.79497
FIG4	-0.0745552	0.0490245	0.79497
ARAP3	-0.11868	0.0490631	0.79497
FXYD1	-0.0963356	0.0490718	0.79497
SELL	-0.0879201	0.0491329	0.79497
NLK	-0.0799858	0.0492413	0.795338
SNRNP27	0.0826645	0.0492867	0.795338
STK11	-0.0989843	0.0493598	0.79546
RAB9A	0.112809	0.049642	0.798946
SLC8A1	-0.101076	0.0497369	0.799413
PPP2R5D	0.104282	0.0499491	0.7999
BRD9	-0.0803229	0.0499523	0.7999
GOLGA5	-0.0935129	0.0499649	0.7999
