# Supplementary material for: Increased protein intake affects pro-opiomelanocortin (POMC) processing, immune function and IGF signaling in peripheral blood mononuclear cells of home-dwelling old subjects using a genome-wide gene expression approach
Source: Genes Nutr. 2019 Nov 28;14:32. doi: 10.1186/s12263-019-0654-6 (PMC6883584; doi:10.1186/s12263-019-0654-6)
Supplement: Supplementary file 3 — Additional file 3: Table S3. Overlapping genes regulated in the protein and carbohydrate groups-those in bold were regulated in opposite direction. [file 12263_2019_654_MOESM3_ESM.xlsx]

## Sheet: Sheet1
Supplemenary table3 - overlapping genes regulated in the protein and carbohydrate groups-those in bold were regulated in opposite direction
Gene symbol	Protein			Carbohydrate
	logFoldChange	p-value	FDR, q<0.25	logFoldChange	p-value	FDR, q<0.25
ABCA1	-0.18278	0.0171234	0.705004	-0.175881	0.00319142	0.857819
AGPAT9	-0.157676	0.0156052	0.705004	-0.150715	0.00927068	0.857819
AK027322	-0.302523	0.0389276	0.784204	-0.282667	0.00475683	0.857819
ANO8	0.222894	0.00388987	0.512376	0.197963	5.61489e-05	0.113561
BDP1	0.136322	0.0274122	0.746643	0.0887132	0.0440863	0.906037
CA429274	-0.267831	0.0130949	0.676092	-0.355976	0.0030722	0.857819
DACT1	-0.121508	0.0264959	0.745887	0.142812	0.0308618	0.906037
DCHS1	-0.103485	0.0217235	0.726881	0.103151	0.0413836	0.906037
DKFZp547I014	0.110104	0.0330932	0.766004	0.105097	0.0480873	0.906037
DKFZp762B162	0.324056	3.67762e-05	0.0743798	0.410432	8.50517e-10	5.81528e-06
EHD4	-0.166028	0.00587699	0.575452	-0.0975396	0.013359	0.857819
FAM119A	-0.130728	0.0458478	0.794883	-0.152587	0.0371738	0.906037
FCER1A	-0.193772	0.0270127	0.746643	-0.13893	0.0485887	0.906037
FCRLB	0.124427	0.0446886	0.794883	-0.10128	0.0305652	0.902761
FIG4	-0.0745552	0.0490245	0.79497	-0.100988	0.0195275	0.857819
FTSJ3	-0.107403	0.00491144	0.552183	0.0904086	0.0160206	0.857819
GALNT10	0.0972457	0.0321232	0.765262	0.0887603	0.0215636	0.863677
GRIP2	-0.154853	0.00188922	0.39527	0.118472	0.00999357	0.857819
HARS2	0.0896375	0.0119286	0.667288	0.0674435	0.03913	0.906037
INSIG1	0.138997	0.0240732	0.733844	-0.0954674	0.0450014	0.906037
KDM5A	-0.282381	4.59085e-07	0.0027855	-0.42371	9.58431e-10	5.81528e-06
MTCP1NB	0.0920844	0.00950077	0.642228	0.0905266	0.0190594	0.857819
MTHFD1L	-0.108724	0.0234543	0.730401	0.0848938	0.0481899	0.906037
NBPF1	-0.199722	0.0278194	0.746643	-0.186001	0.00621313	0.857819
NBPF14	-0.14847	0.0476979	0.794883	-0.191937	0.0198618	0.857819
NDUFS7	-0.0866733	0.0215209	0.726881	-0.0640661	0.0425152	0.906037
OR7E156P	0.102708	0.0421816	0.78976	0.0819187	0.0110665	0.857819
PES1	-0.109615	0.0399948	0.784204	-0.109238	0.00479753	0.857819
PLP2	-0.116813	0.0128326	0.671221	-0.0851555	0.0441082	0.906037
PPP2R5D	0.104282	0.0499491	0.7999	0.0795235	0.0185212	0.857819
PTPRM	0.111716	0.0234196	0.730401	0.0715009	0.0459659	0.906037
RPL23A	0.22178	8.73474e-06	0.035332	0.259608	2.04495e-07	0.000620388
S1PR5	-0.206282	0.00893426	0.641779	-0.597332	2.50564e-08	0.000101353
SFTA3	0.127652	0.0121434	0.667288	0.112371	0.0279425	0.887791
SLC1A7	0.170624	0.00111625	0.347327	-0.138004	0.0227278	0.875535
TMUB1	0.0701148	0.0461223	0.794883	0.102844	0.00388267	0.857819
VAMP8	-0.150484	0.00237887	0.437007	-0.093387	0.0134775	0.857819
WDR89	0.160485	0.0123379	0.667288	0.0969827	0.0459713	0.906037
ZCCHC24	-0.123684	0.0227618	0.726881	-0.0970892	0.0294516	0.89448
ZNF282	-0.114883	0.0166877	0.705004	0.102811	0.0466494	0.906037
ZNF543	0.362283	1.17313e-07	0.0014236	0.300926	1.22444e-06	0.00297172
ZNF791	0.124089	0.0206317	0.722517	0.121939	0.00864068	0.857819
